# Supplementary material for: Thermodynamic and kinetic studies on the Cu2+ coordination chemistry of a novel binucleating pyridinophane ligandElectronic supplementary information (ESI) available: Table S1: observed rate constants for the acid-promoted decomposition of Cu2+ complexes with ligand L. Table S2: observed rate constants for the acid-promoted decomposition of Cu2+ complexes with macrocycle L1. Fig. S1: Variation of some selected 13C chemical shifts as a function of pH. See http://www.rsc.org/suppdata/dt/b2/b209013a/
Source: Royal Society of Chemistry journal article supplement (doi:10.1039/b209013a), 2003-02-11
Supplement: b209013a.doc [file b209013a.doc]

**Supplementary Materials (Kinetic Data)**

**Table S1**. Observed rate constants for the acid-promoted decomposition of Cu(II) complexes with ligand **L** ([Cu]0= [L]0= 1.010-3 M, 0.10M KNO3, 25.0ºC). The values of *kobs* were derived from at least six independent measurements with a standard deviation lower than 5%.

| Species | [H+]/ M | *kobs*/s-1 |
| --- | --- | --- |
|  |  |  |
| HCuL a | 0.0115 | 2.33 |
|  | 0.0200 | 4.25 |
|  | 0.0285 | 6.03 |
|  | 0.0400 | 8.97 |
|  | 0.0575 | 12.26 |
|  |  |  |
| CuL b | 0.0115 | 2.35 |
|  | 0.0200 | 4.40 |
|  | 0.0285 | 5.89 |
|  | 0.0400 | 9.03 |
|  | 0.0575 | 12.60 |
|  |  |  |

a The pH of the starting solution was 6.02. b  The pH of the starting solution was 10.06.

**Table S2**. Observed rate constants for the acid-promoted decomposition of Cu(II) complexes with macrocycle L1 ([L1]0= 1.010-3 M, 0.10M KNO3, 25.0ºC). The values of *k1obs* and *k2obs* correspond to the pseudo-first order rate constants for the faster and the slower steps and they were derived from at least six independent measurements with a standard deviation lower than 5%.

| Species | [H+]/ M | *k1obs*/s-1 | *k2obs*/s-1 |
| --- | --- | --- | --- |
|  |  |  |  |
| HCuL1 a | 0.0115 | 4.20 | 0.16 |
|  | 0.0200 | 7.00 | 0.21 |
|  | 0.0285 | 8.60 | 0.24 |
|  | 0.0400 | 10.60 | 0.27 |
|  | 0.0575 | 11.70 | 0.30 |
|  |  |  |  |
| CuL1 b | 0.0115 | 5.60 | 0.25 |
|  | 0.0200 | 9.10 | 0.29 |
|  | 0.0285 | 11.10 | 0.33 |
|  | 0.0400 | 13.60 | 0.36 |
|  | 0.0575 | 15.00 | 0.38 |
|  |  |  |  |
| Cu2L1(OH) c | 0.0115 | 1.47 | 0.15 |
|  | 0.0200 | 2.55 | 0.19 |
|  | 0.0285 | 3.35 | 0.22 |
|  | 0.0400 | 4.90 | 0.26 |
|  | 0.0575 | 6.90 | 0.31 |
|  |  |  |  |

a The Cu:L molar ratio and the pH of the starting solution were 1:1 and 5.40, respectively. b  The Cu:L molar ratio and the pH of the starting solution were 1:1 and 9.24, respectively. c The Cu:L molar ratio and the pH of the starting solution were 2:1 and 6.23, respectively.

**A**

**B**

**Fig. S1.** Variation of some selected 13C chemical shift as a function of pH.
